# Supplementary material for: Surface modification by assembling: a modular approach based on the match in nanostructures
Source: Royal Society of Chemistry journal article supplement (doi:10.1039/c8tb02789g), 2018-12-19
Supplement: c8tb02789g5.pdf [file c8tb02789g5.pdf]

Supporting Information for

**Surface Modification by Assembling: A Modular Approach Based  
on Match in Nanostructures**

Jifu Mao<sup>a,b,c</sup>, Mahmoud Rouabhia<sup>c</sup>, and Ze Zhang<sup>a,b\*</sup>

- a. Centre de recherche du CHU de Québec, Département de chirurgie, Faculté de médecine, Université Laval, Québec (QC), Canada*[Address here](#).
- b. Centre de recherche Hôpital Saint-François d'Assise, CHU, 10 rue de l'Espinay, Local E00-177, Québec (QC), G1L 3L5, Canada.*
- c. Groupe de Recherche en Écologie Buccale, Faculté de Médecine Dentaire, Université Laval, Québec (QC), Canada*

Correspondence to: Ze Zhang

Centre de recherche Hôpital Saint-François d'Assise, CHU, 10 rue de l'Espinay,

Local E00-177, Québec (QC), G1L 3L5, Canada.

E-mail: Ze.Zhang@chg.ulaval.ca

Tel: (418) 525-4416

Fax: (418) 525-4372

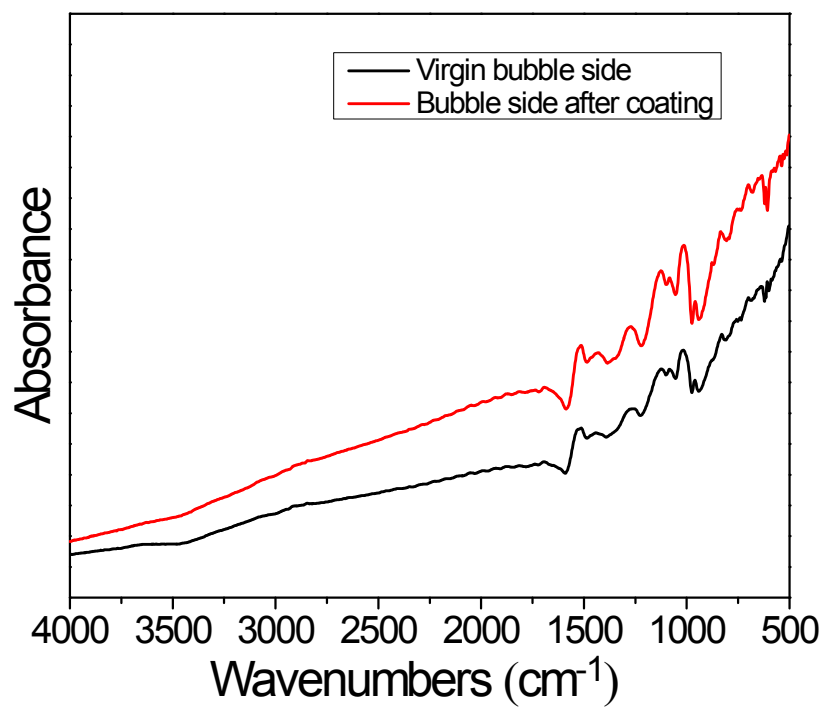

**Figure S1.** FTIR spectra of the bubble side of the membrane before and after (loaded with 1.07 mg cm<sup>-2</sup> particles) particle immobilization followed by washing.

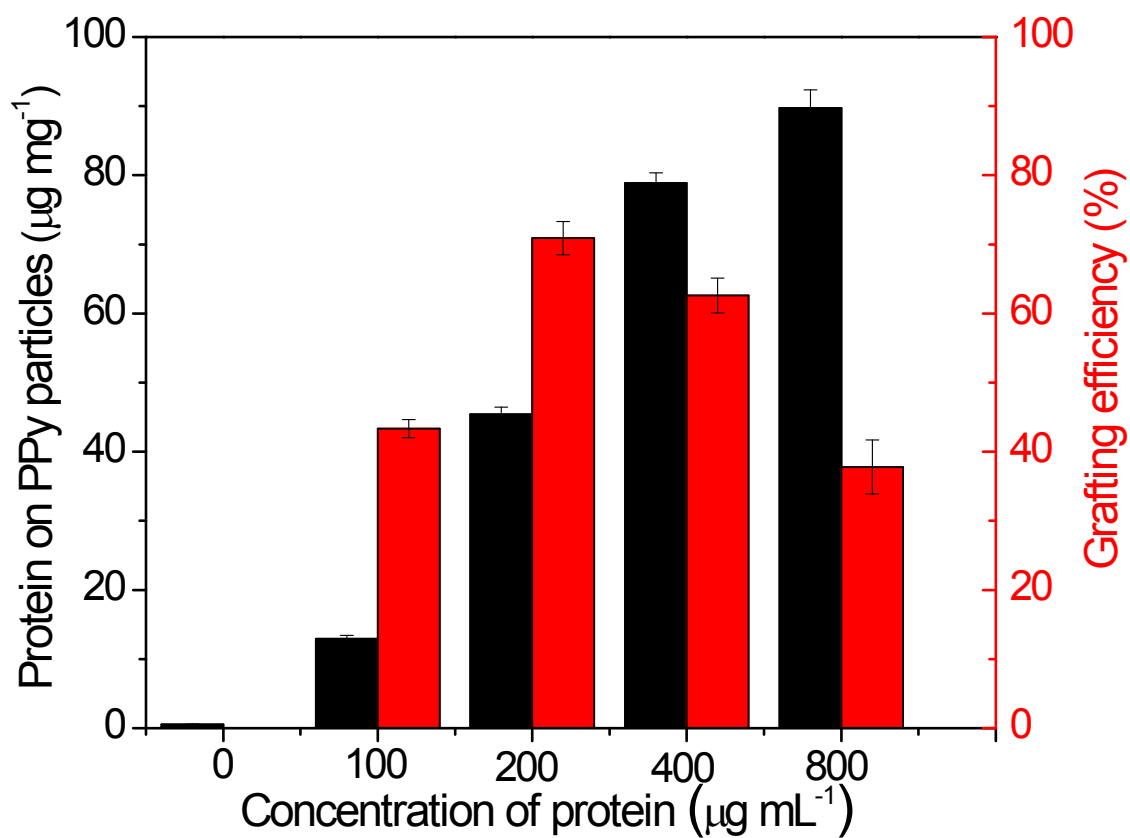

**Figure S2.** Effect of HSA feeding concentration on the quantity of the proteins grafted on particle surface and the grafting efficiency.

Movie 1:

Flexibility of pristine PPy membrane.

Movie 2:

Squeezing of the biofunctionalized PPy membrane.

Movie 3:

Flexibility of the biofunctionalized PPy membrane.

Movie 4:

Compression of a tube made of the biofunctionalized PPy membrane.
